# Supplementary material for: Analysis of the Relationships between DNA Double-Strand Breaks, Synaptonemal Complex and Crossovers Using the Atfas1-4 Mutant
Source: PubMed Central journal article supplement (PMC4492999; doi:10.1371/journal.pgen.1005301), 2015-07-06
Supplement: pgen.1005301.s007.pdf [file pgen.1005301.s007.pdf]

**S1 Table. Comparisons of  $\gamma$ H2AX, AtRAD51, AtDMC1, AtMSH4, AtMLH1 and AtMUS81 foci between WT and *Atfas1-4*.**

|                                                                                          | <b>Col</b>        | <b><i>Atfas1-4</i></b> |
|------------------------------------------------------------------------------------------|-------------------|------------------------|
| <b><math>\gamma</math>H2AX</b>                                                           | 114.17 $\pm$ 5.29 | 180.05 $\pm$ 5.7       |
|                                                                                          | (92-149)          | (100-231)              |
|                                                                                          | n = 20            | n = 21                 |
| <b>AtRAD51</b>                                                                           | 120.55 $\pm$ 2.44 | 175.07 $\pm$ 6.42      |
|                                                                                          | (94-155)          | (121-225)              |
|                                                                                          | n = 38            | n = 28                 |
| <b>AtDMC1</b>                                                                            | 134.39 $\pm$ 3.82 | 179.50 $\pm$ 6.49      |
|                                                                                          | (96-159)          | (143 - 247)            |
|                                                                                          | n = 25            | n = 20                 |
| <b>AtMSH4</b>                                                                            | 123.60 $\pm$ 3.49 | 117.93 $\pm$ 5.57      |
|                                                                                          | (96-159)          | (54-124)               |
|                                                                                          | n = 25            | n = 20                 |
| <b>AtMLH1</b>                                                                            | 8.77 $\pm$ 0.42   | 9.06 $\pm$ 0.49        |
|                                                                                          | (6-14)            | (6-13)                 |
|                                                                                          | n = 20            | n = 20                 |
| <b>AtMUS81</b>                                                                           | 1.86 $\pm$ 0.22   | 1.73 $\pm$ 0.18        |
|                                                                                          | (1-3)             | (1-3)                  |
|                                                                                          | n = 15            | n = 14                 |
| The values in parentheses represent the range of variation. n, number of cells analyzed. |                   |                        |
